# Supplementary material
Source: Springer Nature journal article supplement (https://www.springermedizin.de/resource/supplementary/12950_2007_64_MOESM5_ESM.pdf/9557930)

**A**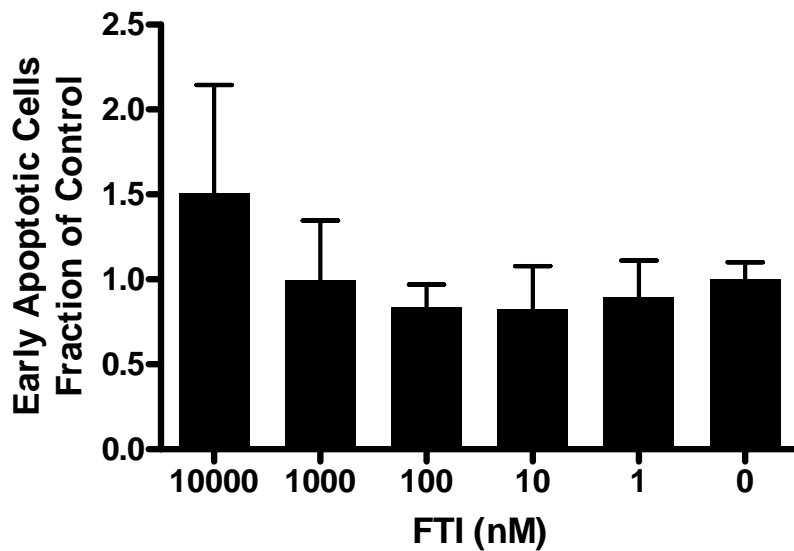**B**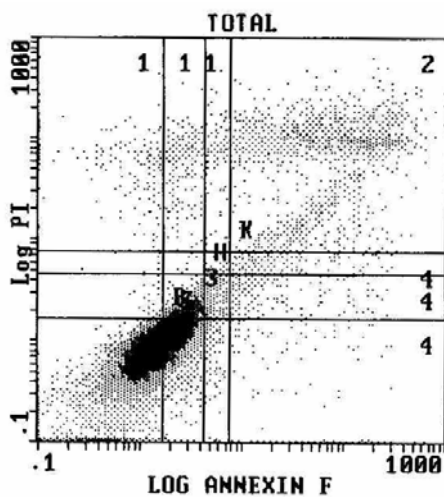**10,000 nM FTI**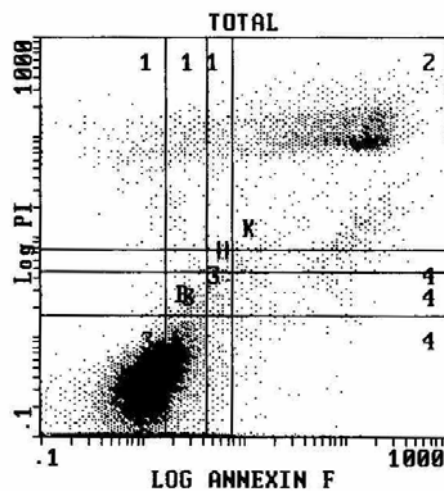**Control**

Supplement: MOESM5 [file 9557930]
